# Supplementary material
Source: PubMed Central journal article supplement (PMC2776112)
Supplement: NIHMS155562-supplement-Supplemental_data.pdf [file NIHMS155562-supplement-Supplemental_data.pdf]

**Supplemental Fig. S1. *Rhodobacter capsulatus* strains harboring WT, N110A or F112A RegB mutations.**

The three strains labeled as WT, N110A and F112A, correspond to mutant strains with chromosomal point mutations in *regB* at the predicted ubiquinone-binding site. The strains were grown on agar solidified RCV minimal media under strict anaerobic photosynthetic conditions. The WT and F112A strains were grown for 3 days, while the N110A strain was grown for 5 days at 30 °C.

**WT  
RegB**

**N110A  
RegB**

**F112A  
RegB**

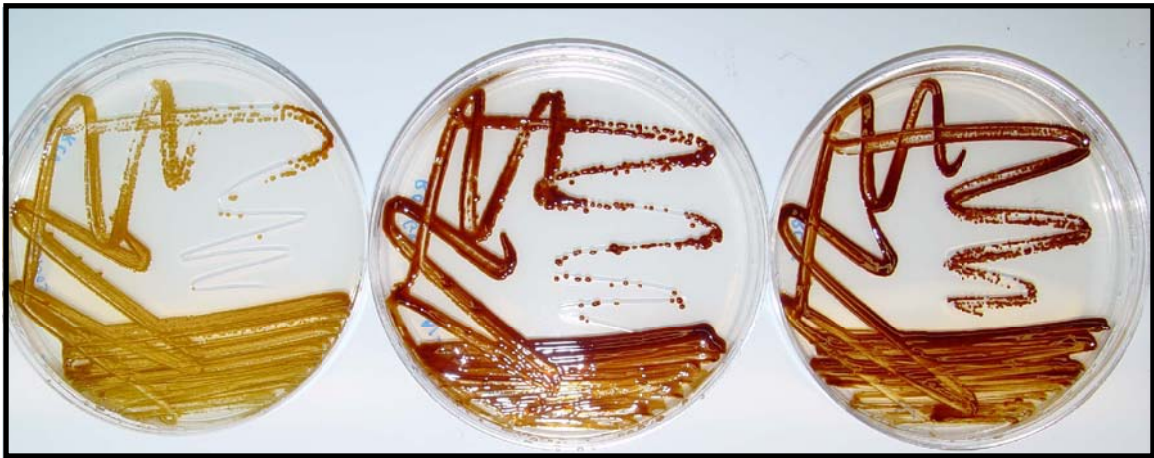

Fig. S1
